# Supplementary material for: Bacterial, Archaeal, and Eukaryotic Diversity across Distinct Microhabitats in an Acid Mine Drainage
Source: PubMed Central journal article supplement (PMC5600952; doi:10.3389/fmicb.2017.01756), 2017-09-12
Supplement: Image_1.pdf [file Image_1.pdf]

**A BACTERIA**

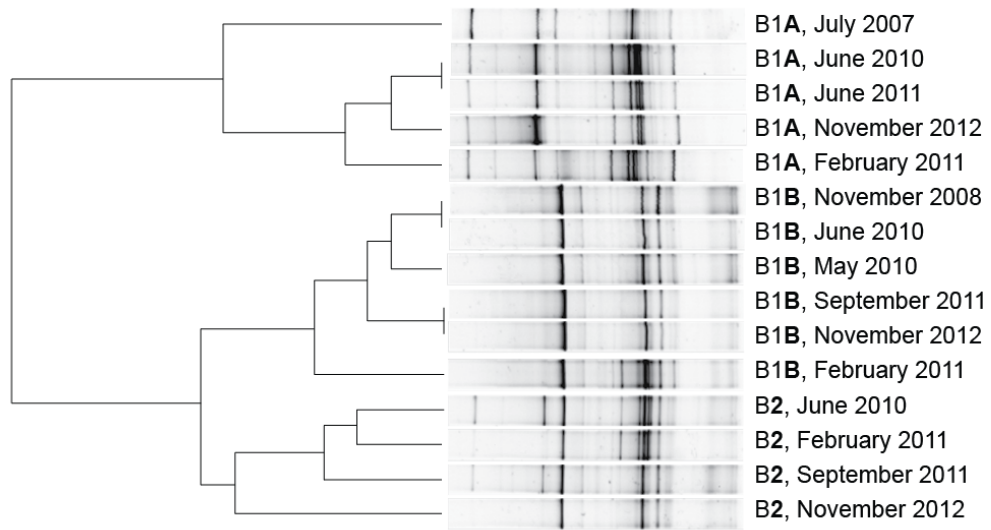

**B ARCHAEA**

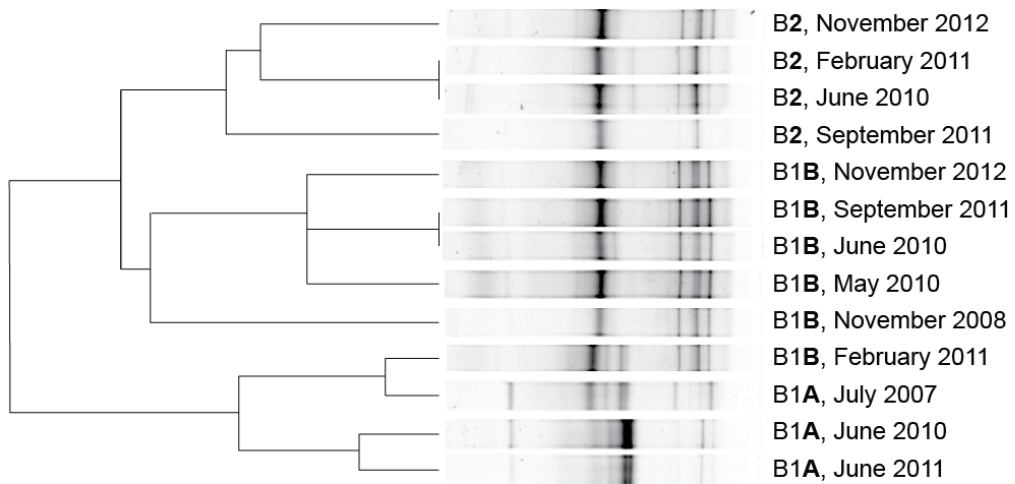

**Supplementary Figure 1.** UPGMA clustering of DGGE profiles for bacterial sequences in sampling efforts of B1A, B1B and B2 biofilms in the period 2007-2012.
