# Supplementary material for: Bacterial, Archaeal, and Eukaryotic Diversity across Distinct Microhabitats in an Acid Mine Drainage
Source: PubMed Central journal article supplement (PMC5600952; doi:10.3389/fmicb.2017.01756), 2017-09-12
Supplement: Image_3.pdf [file Image_3.pdf]

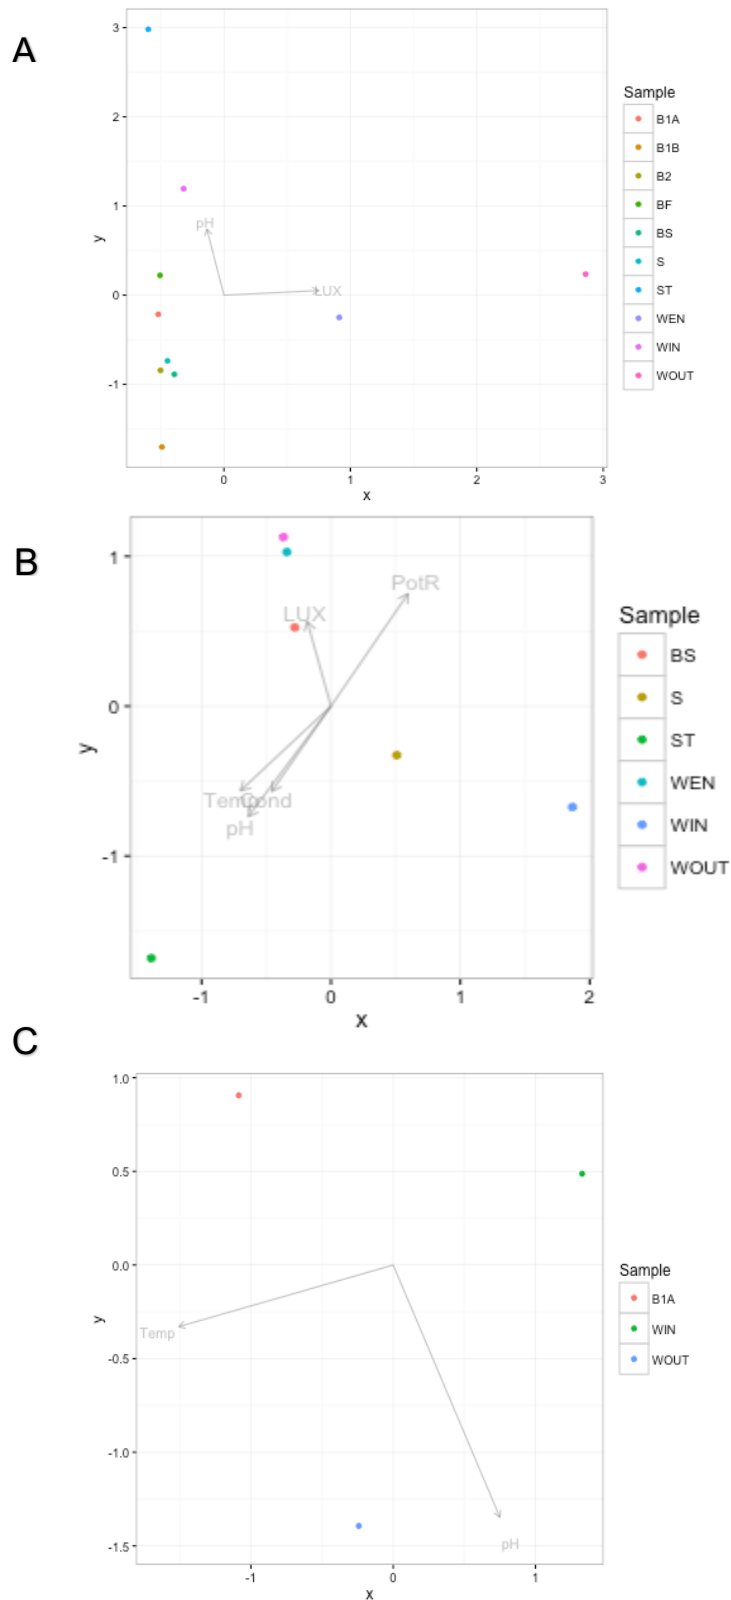

**Supplementary Figure 3.** Ordination diagrams from canonical correspondence analysis (CCA) of bacterial (**A**), archaeal (**B**) and eukarya (**C**) abundances, and geochemical parameters. Arrows indicate the direction and magnitude of geochemical parameters associated with community structures. Each sample is represented by colored circles according to the collection sites. Abbreviations: PotR, Potential Redox; LUX, Luminance; Temp, Temperature; Cond, Conductivity.
